# Supplementary material for: Progress and setbacks in socioeconomic inequalities in adolescent health-related behaviours in Brazil: results from three cross-sectional surveys 2009–2015
Source: PubMed Central journal article supplement — BMJ Open. 2019 Mar 23;9(3):e025338. doi: 10.1136/bmjopen-2018-025338 (PMC6475167; doi:10.1136/bmjopen-2018-025338), 2019-03-23
Supplement: bmjopen-2018-025338supp001.pdf [file bmjopen-2018-025338supp001.pdf]

## Appendix 1

Simple measures of inequality in health-related behaviours among Brazilian adolescents from PeNSE surveys 2009, 2012 and 2015.

| Indicator                                | PeNSE survey year | National | Q1 (poorest) % | Q5 (richest) % | Difference (quintile 5 - quintile 1) % | Difference (quintile 5 - quintile 1) 95% CI | Ratio (quintile 5/ quintile 1) % | Ratio (quintile 5/ quintile 1) 95% CI | Population Attributable risk (PAR) | Population Attributable risk percentage (PAR%) |
|------------------------------------------|-------------------|----------|----------------|----------------|----------------------------------------|---------------------------------------------|----------------------------------|---------------------------------------|------------------------------------|------------------------------------------------|
| Irregular fruit consumption              | 2009              | 68.49    | 74.34          | 64.00          | 10.34                                  | 8.06; 12.62                                 | 1.16                             | 1.12; 1.20                            | -4.49                              | -6.56                                          |
|                                          | 2012              | 70.24    | 75.35          | 66.96          | 8.39                                   | 6.03; 10.74                                 | 1.13                             | 1.08; 1.16                            | -3.28                              | -4.67                                          |
|                                          | 2015              | 67.17    | 72.29          | 64.15          | 8.14                                   | 5.28; 11.00                                 | 1.13                             | 1.08; 1.18                            | -3.02                              | -4.50                                          |
| Irregular vegetables consumption         | 2009              | 68.77    | 76.81          | 61.47          | 15.34                                  | 13.28; 17.41                                | 1.25                             | 1.21; 1.29                            | -7.30                              | -10.62                                         |
|                                          | 2012              | 64.12    | 71.64          | 56.99          | 14.65                                  | 12.46; 16.83                                | 1.26                             | 1.21; 1.30                            | -7.13                              | -11.12                                         |
|                                          | 2015              | 61.73    | 69.97          | 55.14          | 14.83                                  | 11.66; 18.01                                | 1.27                             | 1.20; 1.34                            | -6.59                              | -10.68                                         |
| Irregular beans consumption              | 2009              | 37.45    | 37.38          | 47.74          | -10.36                                 | -12.96; -7.77                               | 0.78                             | 0.74; 0.83                            | 10.29                              | 27.48                                          |
|                                          | 2012              | 40.00    | 41.09          | 51.74          | -10.65                                 | -13.88; -7.42                               | 0.79                             | 0.74; 0.85                            | 11.74                              | 29.35                                          |
|                                          | 2015              | 43.74    | 46.27          | 52.07          | -5.80                                  | -9.17; -2.43                                | 0.89                             | 0.83; 0.95                            | 8.33                               | 19.04                                          |
| Regular softdrinks consumption           | 2009              | 37.21    | 29.67          | 41.59          | -11.92                                 | -14.32; -9.50                               | 0.71                             | 0.67; 0.76                            | 4.38                               | 11.77                                          |
|                                          | 2012              | 35.44    | 28.17          | 36.62          | -8.45                                  | -10.69; -6.20                               | 0.77                             | 0.72; 0.83                            | 1.18                               | 3.33                                           |
|                                          | 2015              | 28.84    | 24.51          | 27.42          | -2.91                                  | -5.45; -0.33                                | 0.89                             | 0.81; 0.98                            | -1.42                              | -4.92                                          |
| Irregular recreational physical activity | 2009              | 82.96    | 85.88          | 78.96          | 6.92                                   | 5.30; 8.55                                  | 1.09                             | 1.07; 1.11                            | -4.00                              | -4.66                                          |
|                                          | 2012              | 74.15    | 77.97          | 70.27          | 7.70                                   | 5.82; 9.58                                  | 1.11                             | 1.08; 1.14                            | -3.88                              | -4.98                                          |
|                                          | 2015              | 75.58    | 78.58          | 72.36          | 6.22                                   | 3.93; 8.51                                  | 1.09                             | 1.05; 1.12                            | -3.22                              | -4.10                                          |
| Alcohol use (once in the last month)     | 2009              | 27.13    | 23.57          | 31.02          | -7.45                                  | -9.22; -5.67                                | 0.76                             | 0.71; 0.81                            | 3.89                               | 14.33                                          |
|                                          | 2012              | 26.78    | 25.55          | 26.33          | -0.78                                  | -2.94; 1.37                                 | 0.97                             | 0.89; 1.05                            | -0.45                              | -1.67                                          |
|                                          | 2015              | 23.2     | 22.24          | 22.50          | -0.26                                  | -2.99; 2.47                                 | 0.99                             | 0.87; 1.12                            | -0.70                              | -3.03                                          |
| Tobacco use (once in the last month)     | 2009              | 6.25     | 6.70           | 5.63           | 1.07                                   | 0.09; 2.06                                  | 1.19                             | 1.01; 1.40                            | -0.62                              | -9.92                                          |
|                                          | 2012              | 6.08     | 7.20           | 4.44           | 2.76                                   | 1.70; 3.82                                  | 1.62                             | 1.35; 1.95                            | -1.64                              | -26.99                                         |
|                                          | 2015              | 5.34     | 7.18           | 4.41           | 2.77                                   | 1.48; 4.06                                  | 1.63                             | 1.28; 2.08                            | -0.93                              | -17.35                                         |

|                                                          |      |       |       |       |       |             |      |            |       |        |
|----------------------------------------------------------|------|-------|-------|-------|-------|-------------|------|------------|-------|--------|
| Drug use (once in the last month)                        | 2009 | 3.32  | 3.01  | 3.52  | -0.51 | -1.29; 0.27 | 0.85 | 0.67; 1.08 | 0.20  | 6.02   |
|                                                          | 2012 | 3.81  | 3.94  | 3.63  | 0.31  | -0.70; 1.32 | 1.09 | 0.83; 1.42 | -0.18 | -4.72  |
|                                                          | 2015 | 2.45  | 2.55  | 2.20  | 0.35  | -0.52; 1.22 | 1.16 | 0.80; 1.69 | -0.25 | -10.20 |
| Unsafe sex (in the last sexual intercourse)              | 2009 | 21.46 | 25.19 | 16.65 | 8.54  | 5.27; 11.82 | 1.51 | 1.27; 1.80 | -4.81 | -22.41 |
|                                                          | 2012 | 22.5  | 24.29 | 18.83 | 5.46  | 2.10; 8.81  | 1.29 | 1.10; 1.51 | -3.67 | -16.31 |
|                                                          | 2015 | 33.86 | 39.11 | 26.00 | 13.11 | 8.21; 18.01 | 1.50 | 1.28; 1.77 | -7.86 | -23.21 |
| Domestic violence (once in the last month)               | 2009 | 9.54  | 10.13 | 8.79  | 1.34  | 0.06; 2.62  | 1.15 | 1.00; 1.33 | -0.75 | -7.86  |
|                                                          | 2012 | 11.6  | 14.08 | 9.87  | 4.21  | 2.82; 5.61  | 1.43 | 1.27; 1.61 | -1.73 | -14.91 |
|                                                          | 2015 | 16.17 | 19.33 | 13.11 | 6.22  | 4.48; 7.96  | 1.47 | 1.32; 1.65 | -3.06 | -18.92 |
| Involvement in gun fights (in the last month)            | 2009 | 4.01  | 3.93  | 3.15  | 0.78  | 0.02; 1.53  | 1.25 | 1.00; 1.55 | -0.86 | -21.45 |
|                                                          | 2012 | 6.94  | 7.50  | 5.65  | 1.85  | 0.82; 2.88  | 1.33 | 1.13; 1.55 | -1.29 | -18.59 |
|                                                          | 2015 | 5.61  | 7.19  | 3.70  | 3.49  | 2.41; 4.58  | 1.94 | 1.56; 2.42 | -1.91 | -34.05 |
| Bullying victimization (twice or more in the last month) | 2009 | 14.16 | 13.71 | 14.54 | -0.83 | -2.16; 0.50 | 0.94 | 0.86; 1.04 | 0.38  | 2.68   |
|                                                          | 2012 | 16.5  | 16.90 | 16.73 | 0.17  | -1.68; 2.04 | 1.01 | 0.90; 1.13 | 0.23  | 1.39   |
|                                                          | 2015 | 21.74 | 24.88 | 18.51 | 6.37  | 4.28; 8.45  | 1.34 | 1.22; 1.48 | -3.23 | -14.86 |
